# Supplementary material
Source: PubMed Central journal article supplement (PMC4718402)
Supplement: NIHMS749875-supplement-supplement.pdf [file NIHMS749875-supplement-supplement.pdf]

# THE LANCET

## Supplementary appendix

This appendix formed part of the original submission and has been peer reviewed. We post it as supplied by the authors.

Supplement to: Desai M, Gutman J, L'anziva A, et al. Intermittent screening and treatment or intermittent preventive treatment with dihydroartemisinin-piperaquine versus intermittent preventive treatment with sulfadoxine-pyrimethamine for the control of malaria during pregnancy in western Kenya: an open-label, three-group, randomised controlled superiority trial. *Lancet* 2015; published online Sept 29. [http://dx.doi.org/10.1016/S0140-6736\(15\)00310-4](http://dx.doi.org/10.1016/S0140-6736(15)00310-4).

1

2 

# Supplemental Content

3 Desai M, Gutman J, L'lanziva A, et al: Intermittent screening and treatment (IST) or  
 4 intermittent preventive treatment (IPT) with dihydroartemisinin-piperaquine versus IPT with  
 5 sulphadoxine-pyrimethamine for the control of malaria in pregnancy in western Kenya: A  
 6 randomized controlled superiority trial

7 **Contents**

|    |                                                                                                                                   |    |
|----|-----------------------------------------------------------------------------------------------------------------------------------|----|
| 8  | eMethods .....                                                                                                                    | 2  |
| 9  | Interim analysis .....                                                                                                            | 2  |
| 10 | Endpoint definitions .....                                                                                                        | 2  |
| 11 | Malaria infection endpoints .....                                                                                                 | 2  |
| 12 | Morbidity endpoints.....                                                                                                          | 2  |
| 13 | Laboratory methods.....                                                                                                           | 3  |
| 14 | Analysis.....                                                                                                                     | 3  |
| 15 | Pre-specified endpoints .....                                                                                                     | 3  |
| 16 | eResults .....                                                                                                                    | 5  |
| 17 | Table S1: Follow-up visits schedule (ITT).....                                                                                    | 5  |
| 18 | Table S2: Malaria at time of delivery (composite excluding PCR) by treatment group (adherence to<br>19 protocol population) ..... | 7  |
| 20 | Table S3: Newborn outcome (composite LBW/SGA/PTB) by treatment group (adherence to<br>21 protocol population) .....               | 8  |
| 22 | Table S4a: Malaria related perinatal outcomes by treatment group (Paucigravidae) .....                                            | 9  |
| 23 | Table S4b: Malaria related perinatal outcomes by treatment group (Multigravidae G3+).....                                         | 11 |
| 24 | Table S5: Adverse events .....                                                                                                    | 13 |
| 25 | Performance of RDTs in ISTp-arm .....                                                                                             | 14 |
| 26 | eReferences .....                                                                                                                 | 14 |

27

28

## 29 **eMethods**

30

### 31 **Interim analysis**

32

33 One interim analysis was planned and conducted to examine the efficacy of ISTp-DP versus  
34 IPTp-SP, with the plan to stop the ISTp-DP arm only (not the whole trial) if ISTp-DP is  
35 significantly less efficacious than IPTp-SP. This was conducted after 777 completed  
36 deliveries (half of the proposed total sample size). As per protocol, the main outcome was the  
37 presence or absence of malaria infection at the time of delivery (the composite of peripheral  
38 and placental parasitemia), detected by placental histology, positive peripheral blood smear at  
39 the time of delivery, or positive RDT at the time of delivery. A two-sided Pearson's chi-  
40 square exact test at  $\alpha = 0.000824$  (O'Brien-Fleming spending function) was used to  
41 compare the ISTp-DP arm versus the IPTp-SP arm. The interim analysis resulted in a p-value  
42 of 0.77 that is not close to the O'Brien-Fleming spending function of  $\alpha = 0.000824$ . Thus,  
43 the ISTp-DP arm was not stopped. The final analyses were tested at a significance level of  
44  $0.025 - 0.000824 = 0.024176$  to decide whether or not we rejected the respective null  
45 hypotheses for the comparison between ISTp-DP and IPTp-SP using a 2-sided p-value.

### 46 **Endpoint definitions**

#### 47 **Malaria infection endpoints**

48 While the primary malaria infection endpoint excluded PCR and past infections by histology,  
49 secondary malaria infection endpoints included consideration of PCR and past infections, the  
50 latter defined as malaria pigment in the absence of parasites on histology.

#### 51 **Morbidity endpoints**

##### 52 *Birthweight data*

53 The aim of the study was to measure birthweight within 24 hours after birth. Birth weights  
54 taken 24-48h hours ( $n= 39, 2.6\%$ ), and 48-168 hours after delivery ( $n= 5, 0.3\%$ ) were  
55 corrected for the physiological fall in birth weight in breastfed infants occurring in the first  
56 days following delivery<sup>1, 2</sup> by a factor +2% and +4%, respectively to obtain the estimated  
57 weight at birth.<sup>3, 4</sup> All analyses used corrected birthweight unless indicated otherwise. Low  
58 birth weight was defined as  $<2,500$  grams.

##### 59 *Gestational age and preterm*

60 If more than one gestational age measurement was available we used estimates in the  
61 following order of preference: neonatal clinical exam within 96 hours of delivery (Ballard  
62 score), last menstrual period (if known), and fundal height at enrolment. Preterm was defined  
63 as a gestational age of less than 37 completed weeks.

##### 64 *Small for gestational age (SGA)*

65 SGA was defined as birthweight below the tenth percentile for a given gestational age and  
66 sex, using a reference population from Tanzania population was used, as ultrasound-based  
67 fetal growth charts were not available for Kenyan populations. This also allowed the  
68 calculation of Z-scores.<sup>5</sup>

## 69 Laboratory methods

70 HIV serology was performed by the study health facilities as part of routine ANC profiling.  
71 Syphilis serology was assessed according to Kenya Ministry of Health guidelines.  
72 Hemoglobin levels were determined using portable HemoCue Hb 201+ (HemoCue AB,  
73 Ängelholm Sweden) machines following manufacture instructions. Malaria rapid diagnostic  
74 test (RDT) was performed as per the manufacturer's instruction. *Plasmodium falciparum*  
75 parasites identification and quantification by microscopy on Giemsa-stained thick and thin  
76 peripheral blood smears were performed according to standard, quality-controlled  
77 procedures. In brief, the blood smears were stained with 10% Giemsa for 15 minutes and  
78 examined under oil immersion for malaria parasites.<sup>6,7</sup> A thick smear was considered  
79 negative if 100 microscopic high powered fields showed no parasites. If thick smear was  
80 positive, malaria parasites and white blood cells (WBC) were counted in the same fields until  
81 a corresponding 500 WBCs were counted. Parasite densities per microliter of blood in the  
82 thick blood smears were estimated using an assumed count of 8,000 WBC per microliter of  
83 blood.<sup>6,7</sup> If the blood smear was positive for thin/impression smear, parasitized red blood cell  
84 (pRBC) and red blood cells (RBCs) were counted in the same field until a corresponding  
85 2000 RBCs were counted and expressed as parasites per microlitre of blood using an assumed  
86 count of 4,500,000 RBCs per microliter of blood.<sup>6-8</sup> All the blood films were read by  
87 microscopists deemed competent through an external quality assurance programme provided  
88 by the national institute of communicable diseases (NICD), South Africa.<sup>9</sup>  
89 Real-time quantitative polymerase chain reaction (RT-qPCR) using *P. falciparum*-specific  
90 primers and probes targeting *P. falciparum* 18S rRNA gene was performed on maternal  
91 peripheral and placental samples, with the inclusion in all reactions of a positive standard and  
92 a negative control with no template DNA. All the PCR assays were done from dried blood  
93 spot (DBS) on a filter paper following standard operating procedures<sup>10,11</sup>. The lower  
94 detection limit of PCR was 5 parasites/uL of blood. Tissue samples collected from the  
95 maternal side of the placenta and fixed with 10% neutral buffered formalin were processed,  
96 stained, and examined following standard procedures.<sup>12</sup> Giemsa-stained placental impression  
97 smears were read following a standardized protocol.<sup>13</sup> Women were screened for syphilis as  
98 part of routine ANC care, using either RPR, VDRL or a Determine rapid diagnostic test kit  
99 (on site). Those determined to be positive for syphilis were treated per national guidelines  
100 with Benzathine Penicillin.

## 101 Analysis

### 102 Pre-specified endpoints

103 The pre-specified endpoints included the primary endpoint of malaria infection at delivery  
104 (composite or peripheral and placental parasitaemia), and several secondary endpoints: low  
105 birthweight, small for gestational age, preterm births, maternal haemoglobin and anaemia,

106 congenital malaria, incidence of malaria infection and all-cause sick visits by the mother and  
107 infant, and serious adverse events in both the mothers and infants.  
108  
109

## eResults

**Table S1: Follow-up visits schedule (ITT)**

| Characteristic                                                                                          | ISTp-DP    | IPTp-DP    | IPTp-SP    |
|---------------------------------------------------------------------------------------------------------|------------|------------|------------|
| Achieved number of scheduled intervention visits<br>(including enrolment, excluding delivery);<br>n (%) |            |            |            |
| 1                                                                                                       | 39         | 32         | 31         |
| 2                                                                                                       | 61         | 82         | 62         |
| 3                                                                                                       | 172        | 175        | 172        |
| 4                                                                                                       | 158        | 149        | 160        |
| 5                                                                                                       | 76         | 63         | 71         |
| 6                                                                                                       | 8          | 12         | 18         |
| 7                                                                                                       | 1          | 1          | 0          |
| Total visits                                                                                            | 1738       | 1705       | 1774       |
| Number of DP or SP courses received; n (%)                                                              |            |            |            |
| 0                                                                                                       | 348 (67.6) | 0 (0)      | 1 (0.2)    |
| 1                                                                                                       | 140 (27.2) | 37 (7.2)   | 46 (9.0)   |
| 2                                                                                                       | 27 (5.2)   | 230 (44.8) | 210 (40.9) |
| 3                                                                                                       | 0          | 134 (26.1) | 127 (24.7) |
| 4                                                                                                       | 0          | 76 (14.8)  | 95 (18.5)  |
| 5                                                                                                       | 0          | 34 (6.6)   | 30 (5.8)   |
| 6                                                                                                       | 0          | 3 (0.6)    | 5 (1.0)    |

|                                                                                     |                      |                      |                      |
|-------------------------------------------------------------------------------------|----------------------|----------------------|----------------------|
| Total courses received (multigravidae)                                              | 73                   | 685                  | 603                  |
| Median (range)                                                                      | 0 (0, 2)             | 2 (1, 6)             | 2 (0, 6)             |
| Mean (SD)                                                                           | 0.29 (0.54)          | 2.73 (1.03)          | 2.72 (1.15)          |
| Number of women requiring AL for symptomatic malaria within 4 weeks of study dosing | 10                   | 5                    | 20                   |
| Person weeks contributed till delivery or till lost to follow-up, median (IQR)      | 16.3<br>(12.7, 19.6) | 16.0<br>(12.4, 19.4) | 16.7<br>(12.7, 20.1) |

**Table S2: Malaria at time of delivery (composite excluding PCR) by treatment group (adherence to protocol population)**

| ISTp-DP<br>n/N (%)          | IPTp-DP<br>n/N (%) | IPTp-SP<br>n/N (%) |                       | PR/Difference<br>(95%CI), p-value<br>ISTp-DP vs IPTp-SP | PR/Difference<br>(95%CI), p-value<br>IPTp-DP vs IPTp-SP | PR/Difference<br>(95%CI), p-value<br>IPTp-DP vs ISTp-DP |
|-----------------------------|--------------------|--------------------|-----------------------|---------------------------------------------------------|---------------------------------------------------------|---------------------------------------------------------|
| <b>All Gravidae</b>         |                    |                    |                       |                                                         |                                                         |                                                         |
| 50/411<br>(12.2)            | 11/409<br>(2.7)    | 47/418<br>(11.2)   | Unadjusted            | 1.08 (0.74, 1.57)<br>p=0.68                             | 0.24 (0.13, 0.46)<br><b>p&lt;0.0001</b>                 | 0.22 (0.12, 0.42)<br><b>p&lt;0.0001</b>                 |
|                             |                    |                    | Adjusted <sup>a</sup> | 1.05 (0.70, 1.58)<br>p=0.80                             | 0.24 (0.12, 0.48)<br><b>p&lt;0.0001</b>                 | 0.23 (0.11, 0.45)<br><b>p&lt;0.0001</b>                 |
| <b>Paucigravidae (G1+2)</b> |                    |                    |                       |                                                         |                                                         |                                                         |
| 32/206<br>(15.5)            | 8/211<br>(3.8)     | 34/235<br>(14.5)   | Unadjusted            | 1.07 (0.69, 1.68)<br>p=0.75                             | 0.26 (0.12, 0.55)<br><b>p=0.0004</b>                    | 0.24 (0.12, 0.52)<br><b>p=0.0002</b>                    |
|                             |                    |                    | Adjusted <sup>a</sup> | 1.04 (0.64, 1.71)<br>p=0.86                             | 0.27 (0.12, 0.62)<br><b>p=0.0019</b>                    | 0.26 (0.12, 0.60)<br><b>p=0.0015</b>                    |
| <b>Multigravidae (G3+)</b>  |                    |                    |                       |                                                         |                                                         |                                                         |
| 18/205<br>(8.8)             | 3/198<br>(1.5)     | 13/183<br>(7.1)    | Unadjusted            | 1.24 (0.62, 2.45)<br>p=0.54                             | 0.21 (0.06, 0.74)<br><b>p=0.0145</b>                    | 0.17 (0.05, 0.58)<br><b>p=0.0043</b>                    |
|                             |                    |                    | Adjusted <sup>a</sup> | 1.14 (0.55, 2.37)<br>p=0.72                             | 0.21 (0.06, 0.72)<br><b>p=0.0138</b>                    | 0.18 (0.05, 0.62)<br><b>p=0.0063</b>                    |

ATP cohort; <sup>a</sup> adjusted for site, gravidity (in pooled model), malaria at enrolment by PCR, rain/seasonality six months prior to delivery, ITN use, hb at enrolment, gestational age at enrolment, and educational status

**Table S3: Newborn outcome (composite LBW/SGA/PTB) by treatment group (adherence to protocol population)**

| ISTp-DP<br>n/N (%)          | IPTp-DP<br>n/N (%) | IPTp-SP<br>n/N (%) |                       | PR/Difference<br>(95%CI), p-value<br>ISTp-DP vs IPTp-SP | PR/Difference<br>(95%CI), p-value<br>IPTp-DP vs IPTp-SP | PR/Difference<br>(95%CI), p-value<br>IPTp-DP vs ISTp-DP |
|-----------------------------|--------------------|--------------------|-----------------------|---------------------------------------------------------|---------------------------------------------------------|---------------------------------------------------------|
| <b>All Gravidae</b>         |                    |                    |                       |                                                         |                                                         |                                                         |
| 52/412<br>(12.6)            | 42/402<br>(10.5)   | 40/413<br>(9.7)    | Unadjusted            | 1.30 (0.88, 1.92)<br>p=0.18                             | 1.08 (0.72, 1.63)<br>p=0.72                             | 0.83 (0.56, 1.21)<br>p=0.33                             |
|                             |                    |                    | Adjusted <sup>a</sup> | 1.33 (0.86, 2.04)<br>p=0.20                             | 0.88 (0.55, 1.42)<br>p=0.60                             | 0.66 (0.42, 1.05)<br>p=0.08                             |
| <b>Paucigravidae (G1+2)</b> |                    |                    |                       |                                                         |                                                         |                                                         |
| 31/207<br>(15.0)            | 30/210<br>(14.3)   | 25/232<br>(10.8)   | Unadjusted            | 1.39 (0.85, 2.27)<br>p=0.19                             | 1.33 (0.81, 2.18)<br>p=0.27                             | 0.95 (0.60, 1.52)<br>p=0.84                             |
|                             |                    |                    | Adjusted <sup>a</sup> | 1.40 (0.81, 2.43)<br>p=0.24                             | 1.02 (0.57, 1.82)<br>p=0.96                             | 0.73 (0.41, 1.28)<br>p=0.27                             |
| <b>Multigravidae (G3+)</b>  |                    |                    |                       |                                                         |                                                         |                                                         |
| 21/205<br>(10.2)            | 12/192<br>(6.3)    | 15/181<br>(8.3)    | Unadjusted            | 1.24 (0.66, 2.32)<br>p=0.51                             | 0.75 (0.36, 1.57)<br>p=0.45                             | 0.61 (0.31, 1.21)<br>p=0.16                             |
|                             |                    |                    | Adjusted <sup>a</sup> | 1.11 (0.55, 2.24)<br>p=0.76                             | 0.60 (0.26, 1.38)<br>p=0.23                             | 0.54 (0.24, 1.19)<br>p=0.13                             |

ATP cohort; <sup>a</sup> adjusted for site, gravidity, malaria at enrolment by PCR, rain/seasonality six months prior to delivery, ITN use, hb at enrolment, gestational age at enrolment, and educational status

**Table S4a: Malaria related perinatal outcomes by treatment group (Paucigravidae)**

|                                                                                                                      | ISTp-DP<br>n/N (%) or<br>N, mean<br>(SD) | IPTp-DP<br>n/N (%) or<br>N, mean<br>(SD) | IPTp-SP<br>n/N (%) or<br>N, mean<br>(SD) | Crude<br>PR/Difference<br>(95%CI), p-value<br><b>ISTp-DP vs IPTp-<br/>SP</b> | Crude PR/Difference<br>(95%CI), p-value<br><b>IPTp-DP vs IPTp-SP</b> | Crude PR/Difference<br>(95%CI), p-value<br><b>IPTp-DP vs ISTp-DP</b> |
|----------------------------------------------------------------------------------------------------------------------|------------------------------------------|------------------------------------------|------------------------------------------|------------------------------------------------------------------------------|----------------------------------------------------------------------|----------------------------------------------------------------------|
| Maternal Hb 3 <sup>rd</sup> trimester                                                                                | 184,<br>10.9 (1.5)                       | 181,<br>11.2 (1.4)                       | 213,<br>11.1 (1.6)                       | -0.16 (-0.46, 0.14)<br>p=0.29                                                | 0.05 (-0.25, 0.35)<br>p=0.74                                         | 0.21 (-0.10, 0.52)<br>p=0.18                                         |
| Maternal anemia<br>(Hb<11g/dl) 3 <sup>rd</sup> trimester                                                             | 89/184<br>(48.4)                         | 80/181<br>(44.2)                         | 100/213<br>(47.0)                        | 1.03 (0.84, 1.27)<br>p=0.78                                                  | 0.94 (0.76, 1.17)<br>p=0.59                                          | 0.91 (0.73, 1.14)<br>p=0.43                                          |
| Maternal moderate anemia<br>(Hb<9g/dl) 3 <sup>rd</sup> trimester                                                     | 16/184<br>(8.7)                          | 7/181<br>(3.9)                           | 22/213<br>(10.3)                         | 0.84 (0.46, 1.55)<br>p=0.58                                                  | 0.37 (0.16, 0.86)<br><b>p=0.0199</b>                                 | 0.44 (0.19, 1.06)<br>p=0.07                                          |
| Maternal Hb, at delivery;<br>mean (SD)                                                                               | 211,<br>11.6 (1.6)                       | 212,<br>11.9 (1.5)                       | 244,<br>11.7 (1.9)                       | -0.06 (-0.36, 0.25)<br>p=0.72                                                | 0.21 (-0.10, 0.51)<br>p=0.19                                         | 0.26 (-0.06, 0.58)<br>p=0.11                                         |
| Maternal anemia<br>(Hb<11g/dl) at delivery                                                                           | 70/211<br>(33.2)                         | 54/212<br>(25.5)                         | 83/244<br>(34.0)                         | 0.98 (0.75, 1.26)<br>p=0.85                                                  | 0.75 (0.56, 1.00)<br>p=0.05                                          | 0.77 (0.57, 1.04)<br>p=0.08                                          |
| Maternal moderate anemia<br>(Hb<9g/dl) at delivery                                                                   | 11/211<br>(5.2)                          | 5/212<br>(2.4)                           | 11/244<br>(4.5)                          | 1.16 (0.51, 2.61)<br>p=0.73                                                  | 0.52 (0.18, 1.48)<br>p=0.22                                          | 0.45 (0.16, 1.28)<br>p=0.13                                          |
| Malaria infection (3 <sup>rd</sup><br>trimester)                                                                     | 32/236<br>(13.6)                         | 20/240<br>(8.3)                          | 60/268<br>(22.4)                         | 0.61 (0.41, 0.90)<br><b>p=0.0121</b>                                         | 0.37 (0.23, 0.60)<br><b>p&lt;0.0001</b>                              | 0.61 (0.36, 1.04)<br>p=0.07                                          |
| Peripheral or placental<br>malaria at delivery (any<br>measure including PCR,<br>excluding past infections)          | 40/225<br>(17.8)                         | 16/224<br>(7.1)                          | 51/258<br>(19.8)                         | 0.90 (0.62, 1.31)<br>p=0.58                                                  | 0.36 (0.21, 0.62)<br><b>p=0.0002</b>                                 | 0.40 (0.23, 0.70)<br><b>p=0.0011</b>                                 |
| Maternal peripheral malaria<br>infection (at delivery, any<br>measure)                                               | 34/225<br>(15.1)                         | 10/224<br>(4.5)                          | 37/258<br>(14.3)                         | 1.05 (0.69, 1.62)<br>p=0.81                                                  | 0.31 (0.16, 0.61)<br><b>p=0.0007</b>                                 | 0.30 (0.15, 0.58)<br><b>p=0.0004</b>                                 |
| Placental malaria (any<br>measure including PCR and<br>past infections on<br>histology)                              | 119/207<br>(57.5)                        | 92/209<br>(44.0)                         | 121/242<br>(50.0)                        | 1.15 (0.97, 1.37)<br>p=0.11                                                  | 0.88 (0.72, 1.07)<br>p=0.21                                          | 0.77 (0.63, 0.93)<br><b>p=0.0066</b>                                 |
| Peripheral or placental<br>malaria at delivery (any<br>measure including PCR and<br>past infections on<br>histology) | 124/225<br>(55.1)                        | 93/224<br>(41.5)                         | 123/258<br>(47.7)                        | 1.16 (0.97, 1.38)<br>p=0.10                                                  | 0.87 (0.71, 1.07)<br>p=0.18                                          | 0.75 (0.62, 0.92)<br><b>p=0.0044</b>                                 |
| Fetal cord Hb (mean, SD)                                                                                             | 200,<br>14.3 (2.4)                       | 204,<br>14.5 (2.4)                       | 231,<br>14.6 (2.9)                       | -0.37 (-0.86, 0.11)<br>p=0.13                                                | -0.18 (-0.67, 0.30)<br>p=0.46                                        | 0.19 (-0.31, 0.69)<br>p=0.45                                         |
| Fetal anemia<br>(Hb<12.5g/dl cord blood)                                                                             | 35/200<br>(17.5)                         | 42/204<br>(20.6)                         | 42/231<br>(18.1)                         | 0.96 (0.64, 1.44)<br>p=0.85                                                  | 1.13 (0.77, 1.66)<br>p=0.53                                          | 1.18 (0.79, 1.76)<br>p=0.43                                          |
| Birthweight<br>(mean, SD)                                                                                            | 3138.1<br>(444.7)                        | 3110.7<br>(450.2)                        | 3201.0<br>(456.1)                        | -62.9 (-147.4,<br>21.7)<br>p=0.15                                            | -90.2 (-174.7, -5.8)<br><b>p=0.0362</b>                              | -27.4 (-114.5, 59.8)<br>p=0.54                                       |
| Corrected birthweight<br>(mean, SD)                                                                                  | 3139.7<br>(444.7)                        | 3115.1<br>(448.5)                        | 3201.8<br>(455.0)                        | -62.2 (-146.0,<br>21.6)                                                      | -86.7 (-170.5, -2.9)<br><b>p=0.0425</b>                              | -24.5 (-110.5, 61.5)<br>p=0.58                                       |

|                                                                                                     |                        |                     |                     |                               |                                          |                               |
|-----------------------------------------------------------------------------------------------------|------------------------|---------------------|---------------------|-------------------------------|------------------------------------------|-------------------------------|
|                                                                                                     |                        |                     |                     | p=0.15                        |                                          |                               |
| Gestational age at birth (weeks)                                                                    | 225<br>38.8 (1.8)      | 223,<br>38.8 (2.3)  | 255,<br>39.0 (1.9)  | -0.21 (-0.57, 0.15)<br>p=0.25 | -0.18 (-0.54, 0.18)<br>p=0.32            | 0.03 (-0.34, 0.40)<br>p=0.88  |
| Birthweight for gestational age (Z-score)                                                           | 212,<br>0.27<br>(1.01) | 211,<br>0.18 (0.95) | 240,<br>0.37 (1.02) | -0.09 (-0.28, 0.09)<br>p=0.31 | -0.19 (-0.37, -0.002)<br><b>p=0.0478</b> | -0.09 (-0.28, 0.10)<br>p=0.35 |
| Small-for-gestational age (SGA)                                                                     | 21/212<br>(9.9)        | 17/211<br>(8.1)     | 18/240<br>(7.5)     | 1.32 (0.72, 2.41)<br>p=0.36   | 1.07 (0.57, 2.03)<br>p=0.83              | 0.81 (0.44, 1.50)<br>p=0.51   |
| Low Birthweight (LBW)                                                                               | 11/209<br>(5.3)        | 16/209<br>(7.7)     | 13/233<br>(5.6)     | 0.94 (0.43, 2.06)<br>p=0.88   | 1.37 (0.68, 2.78)<br>p=0.38              | 1.45 (0.69, 3.06)<br>p=0.32   |
| Preterm birth (PTB)                                                                                 | 16/225<br>(7.1)        | 15/223<br>(6.7)     | 10/255<br>(3.9)     | 1.81 (0.84, 3.91)<br>p=0.13   | 1.72 (0.79, 3.74)<br>p=0.18              | 0.95 (0.48, 1.87)<br>p=0.87   |
| Still birth                                                                                         | 3/225<br>(1.3)         | 1/224<br>(0.5)      | 10/255<br>(3.9)     | 0.34 (0.09, 1.22)<br>p=0.10   | 0.11 (0.01, 0.88)<br><b>p=0.0375</b>     | 0.33 (0.04, 3.19)<br>p=0.34   |
| Fetal loss                                                                                          | 4/225<br>(1.8)         | 3/224<br>(1.3)      | 11/255<br>(4.3)     | 0.41 (0.13, 1.28)<br>p=0.12   | 0.31 (0.09, 1.10)<br>p=0.07              | 0.75 (0.17, 3.33)<br>p=0.71   |
| Any adverse birth outcome                                                                           | 35/225<br>(15.6)       | 31/224<br>(13.8)    | 35/256<br>(13.7)    | 1.14 (0.74, 1.75)<br>p=0.56   | 1.01 (0.65, 1.59)<br>p=0.96              | 0.89 (0.57, 1.39)<br>p=0.61   |
| Congenital malaria infection                                                                        | 4/267<br>(1.50)        | 2/261<br>(0.77)     | 0/290<br>(0.0)      | Not applicable                | Not applicable                           | Not applicable                |
| Infant clinical malaria by 6-8wks (cumulative)                                                      | 1/174<br>(0.6)         | 4/176<br>(2.3)      | 4/198<br>(2.0)      | 0.29 (0.03, 2.60)<br>p=0.27   | 1.12 (0.28, 4.47)<br>p=0.88              | 3.85 (0.43, 34.5)<br>p=0.23   |
| Neonatal death                                                                                      | 4/225<br>(1.8)         | 4/224<br>(1.8)      | 8/255<br>(3.1)      | 0.57 (0.17, 1.86)<br>p=0.35   | 0.57 (0.17, 1.86)<br>p=0.35              | 1.00 (0.25, 3.97)<br>p=0.99   |
| Perinatal death                                                                                     | 7/225<br>(3.1)         | 5/224<br>(2.2)      | 17/255<br>(6.7)     | 0.47 (0.20, 1.10)<br>p=0.08   | 0.33 (0.13, 0.89)<br><b>p=0.0288</b>     | 0.72 (0.23, 2.23)<br>p=0.57   |
| Infant deaths by 6-8wks (end of follow up)                                                          | 4/225<br>(1.8)         | 4/224<br>(1.8)      | 8/255<br>(3.1)      | 0.57 (0.17, 1.86)<br>p=0.35   | 0.57 (0.17, 1.86)<br>p=0.35              | 1.00 (0.25, 3.97)<br>p=0.99   |
| ITT cohort; <sup>a</sup> spontaneous abortion or stillbirth; <sup>b</sup> SGA/LBW/PTB or fetal loss |                        |                     |                     |                               |                                          |                               |

**Table S4b: Malaria related perinatal outcomes by treatment group (Multigravidae G3+)**

|                                                                                                                   | ISTp-DP<br>n/N<br>(%) or<br>N, mean<br>(SD) | IPTp-DP<br>n/N<br>(%) or<br>N, mean<br>(SD) | IPTp-SP<br>n/N (%) or<br>N, mean<br>(SD) | Crude<br>PR/Difference<br>(95%CI), p-<br>value<br>ISTp-DP vs IPTp-<br>SP | Crude<br>PR/Difference<br>(95%CI), p-<br>value<br>IPTp-DP vs<br>IPTp-SP | Crude<br>PR/Difference<br>(95%CI), p-value<br>IPTp-DP vs ISTp-<br>DP |
|-------------------------------------------------------------------------------------------------------------------|---------------------------------------------|---------------------------------------------|------------------------------------------|--------------------------------------------------------------------------|-------------------------------------------------------------------------|----------------------------------------------------------------------|
| Maternal Hb<br>(mean, SD), 3 <sup>rd</sup> trimester                                                              | 200,<br>11.0 (1.3)                          | 189,<br>10.8 (1.4)                          | 162,<br>11.0 (1.4)                       | 0.05 (-0.24, 0.33)<br>p=0.75                                             | -0.13 (-0.42,<br>0.15)<br>p=0.36                                        | -0.18 (-0.45, 0.09)<br>p=0.19                                        |
| Maternal anemia<br>(Hb<11g/dl) 3 <sup>rd</sup> trimester                                                          | 87/200<br>(43.5)                            | 106/189<br>(56.1)                           | 76/162<br>(46.9)                         | 0.93 (0.74, 1.16)<br>p=0.52                                              | 1.20 (0.97, 1.47)<br>p=0.09                                             | 1.29 (1.05, 1.58)<br><b>p=0.0138</b>                                 |
| Maternal moderate anemia<br>(Hb<9g/dl) 3 <sup>rd</sup> trimester                                                  | 14/200<br>(7.0)                             | 14/189<br>(7.4)                             | 9/162<br>(5.6)                           | 1.26 (0.56, 2.84)<br>p=0.58                                              | 1.33 (0.59, 3.00)<br>p=0.49                                             | 1.06 (0.52, 2.16)<br>p=0.88                                          |
| Maternal Hb, at delivery; N,<br>mean (SD)                                                                         | 210,<br>11.5 (1.5)                          | 214,<br>11.5 (1.6)                          | 183,<br>11.4 (1.4)                       | 0.12 (-0.18, 0.42)<br>p=0.44                                             | 0.11 (-0.19,<br>0.41)<br>p=0.48                                         | -0.01 (-0.30, 0.28)<br>p=0.93                                        |
| Maternal anemia<br>(Hb<11g/dl) at delivery                                                                        | 72/210<br>(34.3)                            | 61/214<br>(28.5)                            | 64/183<br>(35.0)                         | 0.98 (0.75, 1.29)<br>p=0.89                                              | 0.82 (0.61, 1.09)<br>p=0.17                                             | 0.83 (0.63, 1.10)<br>p=0.20                                          |
| Maternal moderate anemia<br>(Hb<9g/dl) at delivery                                                                | 9/210<br>(4.3)                              | 14/214<br>(6.5)                             | 9/183<br>(4.9)                           | 0.87 (0.35, 2.15)<br>p=0.77                                              | 1.33 (0.59, 3.00)<br>p=0.49                                             | 1.53 (0.68, 3.45)<br>p=0.31                                          |
| Malaria infection (3rd<br>trimester)                                                                              | 43/237<br>(18.1)                            | 14/238<br>(5.9)                             | 30/202<br>(14.9)                         | 1.22 (0.80, 1.87)<br>p=0.36                                              | 0.40 (0.22, 0.73)<br><b>p=0.0027</b>                                    | 0.32 (0.18, 0.58)<br><b>p=0.0001</b>                                 |
| Peripheral or placental<br>malaria at delivery (any<br>measure including PCR,<br>excluding past infections)       | 39/227<br>(17.2)                            | 10/233<br>(4.3)                             | 22/201<br>(11.0)                         | 1.57 (0.96, 2.55)<br>p=0.07                                              | 0.39 (0.19, 0.81)<br><b>p=0.0112</b>                                    | 0.25 (0.13, 0.49)<br><b>p&lt;0.0001</b>                              |
| Maternal peripheral malaria<br>infection (at delivery, any<br>measure)                                            | 31/227<br>(13.7)                            | 6/233<br>(2.6)                              | 17/201<br>(8.5)                          | 1.61 (0.92, 2.83)<br>p=0.09                                              | 0.30 (0.12, 0.76)<br><b>p=0.0105</b>                                    | 0.19 (0.08, 0.44)<br><b>p=0.0001</b>                                 |
| Placental malaria (any<br>measure including PCR and<br>past infections on histology)                              | 71/207<br>(34.3)                            | 47/212<br>(22.2)                            | 38/184<br>(20.7)                         | 1.66 (1.18, 2.33)<br><b>p=0.0035</b>                                     | 1.07 (0.73, 1.57)<br>p=0.71                                             | 0.65 (0.47, 0.89)<br><b>p=0.0066</b>                                 |
| Peripheral or placental<br>malaria at delivery (any<br>measure including PCR and<br>past infections on histology) | 75/227<br>(33.0)                            | 47/233<br>(20.2)                            | 43/201<br>(21.4)                         | 1.54 (1.12, 2.13)<br><b>p=0.0084</b>                                     | 0.94 (0.65, 1.36)<br>p=0.75                                             | 0.61 (0.45, 0.84)<br><b>p=0.0022</b>                                 |
| Fetal cord Hb (mean, SD)                                                                                          | 200,<br>14.0 (2.4)                          | 197,<br>14.1 (2.2)                          | 172,<br>14.1 (2.2)                       | -0.15 (-0.61, 0.31)<br>p=0.53                                            | -0.02 (-0.49,<br>0.44)<br>p=0.92                                        | 0.13 (-0.32, 0.57)<br>p=0.58                                         |
| Fetal anemia<br>(Hb<12.5g/dl cord blood)                                                                          | 45/200<br>(22.5)                            | 39/197<br>(19.8)                            | 34/172<br>(19.8)                         | 1.14 (0.77, 1.69)<br>p=0.52                                              | 1.0 (0.66,<br>1.51)<br>p=0.99                                           | 0.88 (0.60, 1.29)<br>p=0.51                                          |
| Birthweight<br>(mean, SD)                                                                                         | 3320.5<br>(502.5)                           | 3255.0<br>(395.0)                           | 3365.0<br>(447.1)                        | -44.5 (-136.4,<br>47.4)<br>p=0.34                                        | -110.0 (-201.7, -<br>18.3)<br><b>p=0.0188</b>                           | -65.5 (-153.5, 22.5)<br>p=0.14                                       |
| Corrected birthweight<br>(mean, SD)                                                                               | 3330.6<br>(503.9)                           | 3262.6<br>(404.4)                           | 3372.9<br>(457.0)                        | -42.4 (-134.3,<br>49.5)<br>p=0.37                                        | -110.3 (-202.1, -<br>18.5)<br><b>p=0.0185</b>                           | -67.9 (-156.2, 20.4)<br>p=0.13                                       |

|                                                |                     |                     |                     |                                  |                                             |                               |
|------------------------------------------------|---------------------|---------------------|---------------------|----------------------------------|---------------------------------------------|-------------------------------|
| Gestational age at birth (weeks)               | 226,<br>39.3 (1.7)  | 225,<br>39.2 (2.0)  | 196,<br>39.3 (1.7)  | 0.003 (-0.34,<br>0.35)<br>p=0.99 | -0.09 (-0.43,<br>0.26)<br>p=0.63            | -0.09 (-0.42, 0.24)<br>p=0.60 |
| Birthweight for gestational age (Z-score)      | 204,<br>0.59 (1.14) | 206,<br>0.40 (0.97) | 182,<br>0.69 (1.11) | -0.10 (-0.31, 0.12)<br>p=0.37    | -0.29 (-0.50, -<br>0.07)<br><b>p=0.0084</b> | -0.19 (-0.40, 0.02)<br>p=0.07 |
| Small-for-gestational age (SGA)                | 15/204<br>(7.4)     | 10/206<br>(4.9)     | 7/182<br>(3.9)      | 1.91 (0.80, 4.58)<br>p=0.15      | 1.26 (0.49, 3.25)<br>p=0.63                 | 0.66 (0.30, 1.44)<br>p=0.29   |
| Low Birthweight (LBW)                          | 8/204<br>(3.9)      | 5/176<br>(2.8)      | 6/205<br>(2.9)      | 1.38 (0.46, 4.14)<br>p=0.56      | 1.03 (0.32, 3.32)<br>p=0.96                 | 0.75 (0.26, 2.11)<br>p=0.58   |
| Preterm birth (PTB)                            | 13/226<br>(5.8)     | 8/225<br>(3.6)      | 11/196<br>(5.6)     | 1.02 (0.47, 2.24)<br>p=0.95      | 0.63 (0.26, 1.54)<br>p=0.32                 | 0.62 (0.26, 1.46)<br>p=0.27   |
| Still birth                                    | 7/229<br>(3.1)      | 3/228<br>(1.3)      | 6/198<br>(3.0)      | 1.01 (0.34, 2.95)<br>p=0.99      | 0.43 (0.11, 1.71)<br>p=0.23                 | 0.43 (0.11, 1.64)<br>p=0.22   |
| Fetal loss                                     | 7/229<br>(3.1)      | 4/228<br>(1.8)      | 6/198<br>(3.0)      | 1.01 (0.34, 2.95)<br>p=0.99      | 0.58 (0.17, 2.02)<br>p=0.39                 | 0.57 (0.17, 1.93)<br>p=0.37   |
| Any adverse birth outcome                      | 29/229<br>(12.7)    | 17/228<br>(7.5)     | 19/198<br>(9.6)     | 1.32 (0.76, 2.28)<br>p=0.32      | 0.78 (0.42, 1.45)<br>p=0.43                 | 0.59 (0.33, 1.04)<br>p=0.07   |
| Congenital malaria infection                   | 1/247<br>(0.4)      | 0/243<br>(0.0)      | 0/218<br>(0.0)      | Not applicable                   | Not applicable                              | Not applicable                |
| Infant clinical malaria by 6-8wks (cumulative) | 8/194<br>(4.1)      | 7/190<br>(3.7)      | 1/162<br>(0.6)      | 6.53 (0.82, 52.2)<br>p=0.08      | 5.74 (0.71, 46.7)<br>p=0.10                 | 0.88 (0.32, 2.42)<br>p=0.80   |
| Neonatal death                                 | 2/229<br>(0.9)      | 0/228<br>(0.0)      | 4/198<br>(2.0)      | 0.43 (0.08, 2.34)<br>p=0.33      | Not applicable                              | Not applicable                |
| Perinatal death                                | 9/229<br>(3.9)      | 3/228<br>(1.3)      | 10/198<br>(5.1)     | 0.78 (0.32, 1.88)<br>p=0.58      | 0.26 (0.07,<br>0.93)<br><b>p=0.0388</b>     | 0.33 (0.09, 1.22)<br>p=0.1    |
| Infant deaths by 6-8wks (end of follow up)     | 2/229<br>(0.9)      | 0/228<br>(0.0)      | 5/198<br>(2.5)      | 0.35 (0.07, 1.76)<br>p=0.20      | Not applicable                              | Not applicable                |

ITT cohort; <sup>a</sup> spontaneous abortion or stillbirth; <sup>b</sup> SGA/LBW/PTB or fetal loss

**Table S5: Adverse events**

|                                                                        | ISTp-DP             |                          | IPTp-DP             |                          | IPTp-SP             |                          |
|------------------------------------------------------------------------|---------------------|--------------------------|---------------------|--------------------------|---------------------|--------------------------|
| <b>Within 30 minutes following drug administration</b>                 |                     |                          |                     |                          |                     |                          |
| Vomiting initial dose (each course)                                    | 2/ 245 (0.8%)       |                          | 4/ 1725 (0.2%)      |                          | 3/ 1787 (0.2%)      |                          |
| Vomiting repeat dose                                                   | 0/ 2 (0%)           |                          | 3/ 4 (75%)          |                          | 0/ 3 (0%)           |                          |
| <b>Tolerability 1-7 days following drug administration<sup>a</sup></b> |                     |                          |                     |                          |                     |                          |
|                                                                        | Events <sup>b</sup> | IR (95% CI) <sup>c</sup> | Events <sup>b</sup> | IR (95% CI) <sup>c</sup> | Events <sup>b</sup> | IR (95% CI) <sup>c</sup> |
| Total number of women who received medication at least once (N)        | 187                 |                          | 487                 |                          | 487                 |                          |
| Any reported drug tolerability event                                   | 2                   | 45.4 (11.4-181.4)        | 27                  | 83.8 (57.4-122.1)        | 36                  | 108.2 (78.1-150.0)       |
| Fever                                                                  | 2                   | 45.4 (11.35-181.4)       | 2                   | 6.2 (1.6-24.8)           | 8                   | 24.1 (12.0-48.1)         |
| Weakness                                                               | 0                   | 0                        | 3                   | 9.3 (3.0-28.9)           | 10                  | 30.1 (16.2-55.9)         |
| Headache                                                               | 2                   | 22.7 (3.2-161.1)         | 8                   | 18.6 (8.4-41.4)          | 14                  | 24.1 (12.0-48.1)         |
| Abdominal pain                                                         | 1                   | 22.7 (3.2-161.1)         | 18                  | 55.8 (35.2-88.6)         | 17                  | 51.1 (31.8-82.2)         |
| Muscle pain                                                            | 1                   | 22.7 (3.2-161.1)         | 6                   | 18.6 (8.4-41.4)          | 8                   | 24.1 (12.0-48.1)         |
| Nausea                                                                 | 0                   | 0                        | 4                   | 12.4 (4.7-33.1)          | 3                   | 9.0 (2.9-28.0)           |
| Rash                                                                   | 0                   | 0                        | 0                   | 0                        | 1                   | 3.0 (0.4-21.3)           |
| Diarrhea                                                               | 0                   | 0                        | 1                   | 3.1 (0.4-22.0)           | 1                   | 3.0 (0.4-21.3)           |
| Vomiting                                                               | 0                   | 0                        | 4                   | 12.4 (4.7-33.1)          | 3                   | 9.0 (2.9-28.0)           |

<sup>a</sup> includes symptoms which were asked to all women presenting for unscheduled visits

<sup>b</sup> no woman had more than one event within seven days of drug administration, thus number of women is the same as the number of events

<sup>c</sup> incidence rate per 100 person years

## Performance of RDTs in ISTp-arm

Post-hoc analysis of the sensitivity of RDTs in the ISTp arm to detect PCR positive infections in the peripheral blood was 52.5% (95% CI 47.8-57.2%) overall and 64.9% (58.6-71.3%) and 40.4% (33.9-46.8%) in pauci,- and multigravidae, which could be explained by higher geometric mean parasite densities observed in paucigravidae: geometric mean (95% CI) 158 (88-283) compared to 33 (13-80) in multigravidae.

## References

1. Noel-Weiss J, Courant G, Woodend AK. Physiological weight loss in the breastfed neonate: a systematic review. *Open medicine : a peer-reviewed, independent, open-access journal* 2008; **2**(4): e99-e110.
2. Flaherman VJ, Kuzniewicz MW, Li S, Walsh E, McCulloch CE, Newman TB. First-day weight loss predicts eventual weight nadir for breastfeeding newborns. *Archives of disease in childhood Fetal and neonatal edition* 2013; **98**(6): F488-92.
3. Greenwood BM, Greenwood AM, Snow RW, Byass P, Bennett S, Hatib-N'Jie AB. The effects of malaria chemoprophylaxis given by traditional birth attendants on the course and outcome of pregnancy. *Transactions of the Royal Society of Tropical Medicine and Hygiene* 1989; **83**(5): 589-94.
4. D'Alessandro U, Langerock P, Bennett S, Francis N, Cham K, Greenwood BM. The impact of a national impregnated bed net programme on the outcome of pregnancy in primigravidae in The Gambia. *Transactions of the Royal Society of Tropical Medicine and Hygiene* 1996; **90**(5): 487-92.
5. Schmiegelow C, Scheike T, Oesterholt M, et al. Development of a fetal weight chart using serial trans-abdominal ultrasound in an East African population: a longitudinal observational study. *PloS one* 2012; **7**(9): e44773.
6. Prudhomme O'Meara W, Remich S, Ogutu B, et al. Systematic comparison of two methods to measure parasite density from malaria blood smears. *Parasitology research* 2006; **99**(4): 500-4.
7. Warhurst DC, Williams JE. ACP Broadsheet no 148. July 1996. Laboratory diagnosis of malaria. *Journal of clinical pathology* 1996; **49**(7): 533-8.
8. Research Malaria Microscopy Standards Working Group. Microscopy for the detection, identification and quantification of malaria parasites on stained thick and thin films. Geneva:World Health Organization., 2015.
9. Swysen C, Vekemans J, Bruls M, et al. Development of standardized laboratory methods and quality processes for a phase III study of the RTS, S/AS01 candidate malaria vaccine. *Malaria journal* 2011; **10**: 223.
10. Hermsen CC, Telgt DS, Linders EH, et al. Detection of Plasmodium falciparum malaria parasites in vivo by real-time quantitative PCR. *Molecular and biochemical parasitology* 2001; **118**(2): 247-51.
11. Mayor A, Serra-Casas E, Bardaji A, et al. Sub-microscopic infections and long-term recrudescence of Plasmodium falciparum in Mozambican pregnant women. *Malaria journal* 2009; **8**: 9.
12. Ordi J, Ismail MR, Ventura PJ, et al. Massive chronic intervillitis of the placenta associated with malaria infection. *American Journal of Surgical Pathology* 1998; **22**(8): 1006-11.
13. Rogerson SJ, Mkundika P, Kanjala MK. Diagnosis of Plasmodium falciparum malaria at delivery: comparison of blood film preparation methods and of blood films with histology. *Journal of Clinical Microbiology* 2003; **41**(4): 1370-4.
